# Supplementary material for: Glandular and Non-Glandular Trichomes from Phlomis herba-venti subsp. pungens Leaves: Light, Confocal, and Scanning Electron Microscopy and Histochemistry of the Secretory Products
Source: MDPI journal article supplement (doi:10.3390/plants12132423), 2023-06-23
Supplement: s1 [file s1]

**Table S1.** The main constituents of volatile oils in *Phlomis herba venti* with different geographical origins (identified by GC and GC-MS analyses).

| Chemical family                   | Components                                                                                                 | Origin                             | Reference                          |
|-----------------------------------|------------------------------------------------------------------------------------------------------------|------------------------------------|------------------------------------|
| Sesquiterpens                     | Germacrene D -11.7%, $\beta$ -bourbonene – 7.3%, $\beta$ –caryophyllene – 5.0%                             | Shanjan Region, Iran               | Delnavazi et al, 2014 [28]         |
|                                   | Germacrene D -31.1%, T-muurolol – 11.0%, $\beta$ –caryophyllene – 1.7%, $\beta$ -bourbonene – 1.5%         | Mazandaran province, northern Iran | Khalilzadeh et al, 2008 [30]       |
|                                   | Germacrene D -7.2%, $\beta$ -bourbonene – 0.8%, $\beta$ –caryophyllene – 0.6%                              | Ankara, Turkey                     | Sarikurkcü et al, 2016 [29]        |
|                                   | Germacrene D -33.9%, $\alpha$ -muurolene – 4.2%, $\beta$ -bourbonene – 4.0%, $\beta$ –caryophyllene – 2.4% | Mazandaran province, northern Iran | Morteza-Semnani et al, 2004 [32]   |
|                                   | Germacrene D -24.5%, $\beta$ -farnesene – 13.4%, bicyclogermacrene – 14.1%                                 | Orromiyehe, Province, Iran         | Masoudi et al, 2006 [31]           |
| Monoterpenes                      | $\alpha$ -pinene – 7.3%, terpinolene – 9.1%                                                                | Shanjan Region, Iran               | Delnavazi et al, 2014 [28]         |
|                                   | $\alpha$ -pinene – 7.1%                                                                                    | Mazandaran province, northern Iran | Khalilzadeh et al, 2008 [30]       |
|                                   | $\alpha$ -pinene – 13.5%                                                                                   | Ankara, Turkey                     | Sarikurkcü et al, 2016 [29]        |
|                                   | $\alpha$ -pinene – 9.4%                                                                                    | Mazandaran province, northern Iran | Morteza-Semnani et al, 2004 [32]   |
|                                   | $\alpha$ -pinene – 13.5%                                                                                   | Orromiyehe, Province, Iran         | Masoudi et al, 2006 [31]           |
| Hexadecanoic acid (palmitic acid) | 7.4%                                                                                                       | Shanjan Region, Iran               | Delnavazi et al, 2014 [28]         |
|                                   | -                                                                                                          | Mazandaran province, northern Iran | Khalilzadeh et al, 2008 [30]       |
|                                   | 68.1%                                                                                                      | Ankara, Turkey                     | Sarikurkcü et al, 2016 [29]        |
|                                   | 12.9%                                                                                                      | Mazandaran province, northern Iran | Morteza-Semnani et al, 2004 [2004] |
|                                   | 0.1%                                                                                                       | Orromiyehe, Province, Iran         | Masoudi et. al, 2006 [31]          |
